# Supplementary material
Source: PubMed Central journal article supplement (PMC3600058)
Supplement: NIHMS428571-supplement-1_si_001.pdf [file NIHMS428571-supplement-1_si_001.pdf]

# **Non-competitive modulation of the proteasome by imidazoline scaffolds overcome bortezomib resistant and delay MM tumor growth in vivo**

Theresa A. Lansdell<sup>1</sup>, Michelle A. Hurchla<sup>2</sup>, Jingyu Xiang<sup>2</sup>, Stacy Hovde<sup>3</sup>, Katherine N. Weilbaecher<sup>2</sup>, R. William Henry<sup>3</sup> and Jetze J. Tepe<sup>1\*</sup>

Departments of <sup>1</sup>Chemistry and <sup>3</sup>Biochemistry & Molecular Biology, Michigan State University, East Lansing, Michigan, <sup>2</sup>Washington University School of Medicine, St. Louis, Missouri.

## **SUPPLEMENTAL**

### **Supplemental Methods**

#### **Determination of critical micelle concentration and drug aggregation**

A method based on the tautomerization of benzoylactone was used to determine the critical micellar concentration of TCH-013.<sup>1,2</sup> The Critical Micelle Concentration was determined to be the amount of agent necessary to shift the band centered at  $\lambda$ 250 (due to the keto form of benzoylactone) to the band centered at  $\lambda$ 312 (due to the enolic form of benzyolacetone) as measured on a SpectraMax M5e spectrometer.

To determine aggregate formation, the fluorogenic substrate Suc-LLVY-AMC was used to measure CT-L proteasome activity pre- and post-centrifugation. Reactions (1 mL) were set up in 1.5 mL microcentrifuge tubes and contained 1 nM of purified human 20S proteasome in 50 mM Tris-HCl pH 7.5 and 0.03% SDS with either vehicle or concentrations of TCH-013 ranging from

1-20  $\mu$ M. CT-L activity was measured as above, using 200  $\mu$ L aliquots of the pre-centrifuged reaction mix transferred to a black clear bottom 96-well plate after adding 50  $\mu$ M fluorogenic Suc-LLVY-AMC substrate. The remainder of the reaction mix was centrifuged at 20,000 X g for 30 minutes at 4 °C. After centrifugation, 200  $\mu$ L of the supernatant was aliquoted to a black clear bottom 96-well plate and CT-L activity was measured after the addition of 50  $\mu$ M fluorogenic CT-L substrate as described above. The IC<sub>50</sub> values were compared from pre-centrifuged and post-centrifuged samples to determine if TCH-013 aggregated. In the determination of aggregate formation, proteolytic assays were also performed in assay buffer with the addition of either 0.5% BSA, 0.1% trypsin or 0.04% triton X-100.

### **Bioavailability of TCH-013**

To assess the bioavailability of TCH-013 administered via intraperitoneal injection (i.p.), female immune competent BALB/c mice (6-8 weeks of age) were weighed and distributed into treatment groups (n=5). Mice received 150 mg/kg TCH-013 in 10% propylene glycol/water) via intraperitoneal injection. One, three and six hours post drug treatment blood was drawn via saphenous vein collection into heparinized 75 mm hematocrit tubes (Drummond). Isolated serum (10  $\mu$ L) was added to 200  $\mu$ L of ice cold HPLC grade acetonitrile in a microcentrifuge tube. The samples were vortexed vigorously for 10 minutes at 4 °C and centrifuged at 5000g for 15 minutes at 4 °C. After centrifugation, 100  $\mu$ L of the supernatant was transferred to a 96-well polypropylene microtiter plate and analyzed for TCH-013a concentration levels by LC/MS on a Waters LCT Premier mass spectrometer equipped with Shimadzu SIL-5000 autosampler and LC-20AD pumps. Analysis was performed using a Waters Atlantis dC18 column (2.1 mm X 50 mm, 3  $\mu$ m particles) using a flow rate of 0.3 mL/min. The gradient consisted of 10 mM aqueous

ammonium acetate (solvent A) and acetonitrile (solvent B), starting at 90% A with a linear gradient to 100% B at 5 minutes. Volumes of 10  $\mu$ L were injected and analyzed using positive mode electrospray ionization. Retention times and response factors were obtained through analysis of authentic standards of TCH-013.

### **Reversibility of TCH-013**

Reversibility of proteasome inhibition with TCH-013 was tested using a membrane washout assay. The CT-L activity with 5  $\mu$ M Suc-LLVY-AMC was measured in the following samples: (1) 1 nM human proteasome (vehicle added), and then washed with 500 volumes of 50 mM Tris/HCl buffer, pH 8, on a membrane concentrator (Amicon Ultracel regenerated cellulose centrifugal filter, 10,000 MWCO); (2) proteasomes pretreated for 10 min with 10  $\mu$ M TCH-013 and then washed as above; and (3) proteasomes pretreated with 1  $\mu$ M MG-132 and washed as above.

### **Human MM xenograft model**

All procedures carried out in this experiment were conducted in compliance with all the laws, regulations and guidelines of the National Institute of Health (NIH) and with the approval of Discovery and Imaging Services, Ann Arbor's DIS-AA Animal Care and Use Committee. DIS-AA is an AAALAC accredited facility. All mice were observed for clinical signs at least once daily. All mice were dosed according to individual body weight on the day of treatment (0.2 mL/20g). Body weights and tumor measurements were recorded five times weekly. Mice were weighed on each day of treatment and at least twice weekly thereafter. Treatments began on day 34, when the mean estimated tumor mass for all groups in the experiment was 122 mg (range of group means, 122-124 mg). All mice weighed  $\geq$ 20.2 g at the initiation of therapy. Mean group

body weights at first treatment were well matched (range of group means, 20.9-21.9 g).

Bortezomib was dissolved in normal saline (0.9% NaCl) on each day of administration. The formulation was sonicated for 5 minutes to create a clear solution with a pH of 5.5. TCH-013 was stored at 4 °C. Dosing solutions for TCH-013 were prepared on each treatment day. The compound was dissolved in pre-warmed propylene glycol, 10% of total vehicle volume and sterile water, prewarmed to 37 °C was added with vortexing so that the final vehicle contained 10% propylene glycol and 90% sterile water. This produced a clear solution with a pH of 3.5.

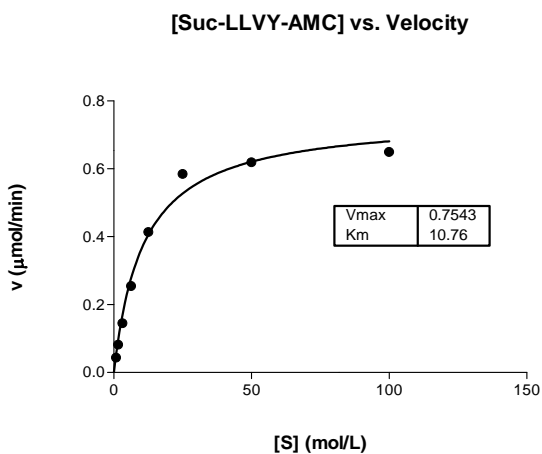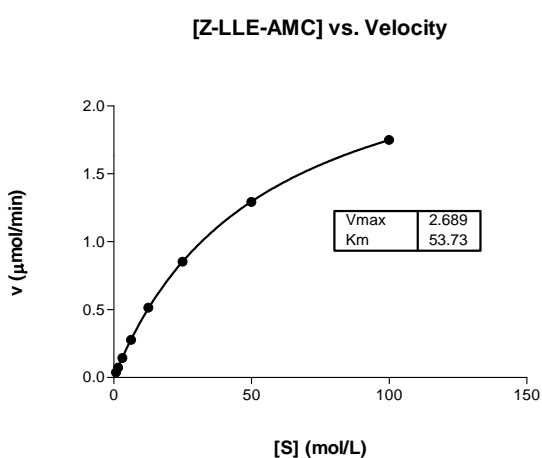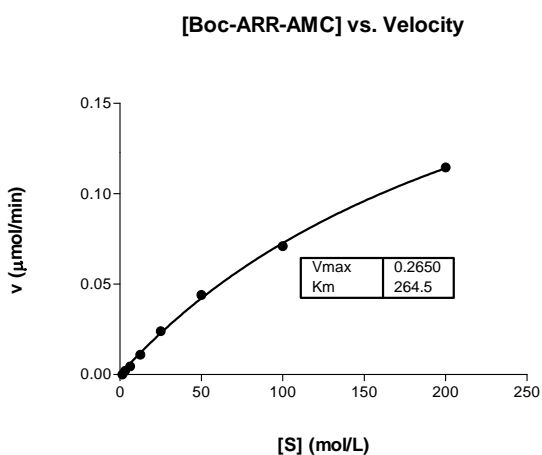

**Supplemental Fig. 1. Determination of  $K_m$  for substrates Suc-LLVY-AMC, Z-LLE-AMC and Boc-ARR-AMC.** Human purified 20S particles (1 nM) was activated in 0.03% SDS, 10 mM Tris-HCL pH 7.5 and substrate was added in a range of 0-200  $\mu$ M. The maximum increase in fluorescence per minute was used to calculate specific activities of each sample and  $K_m$  was determined by Michaelis-Menton analysis.

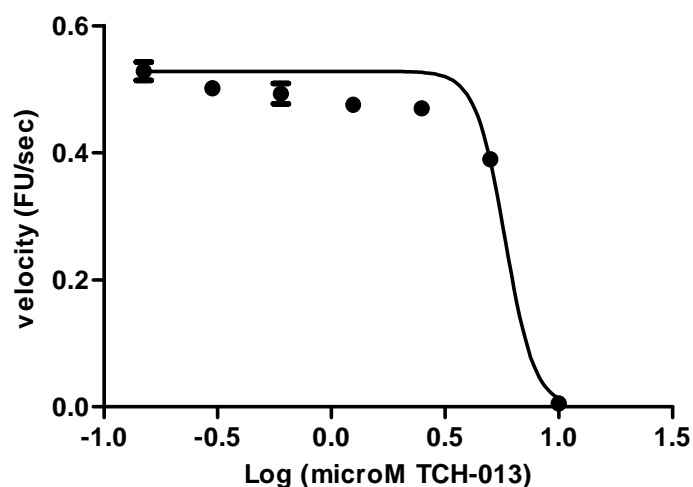

| log(inhibitor) vs. response -- Variable slope (four parameters) |          |
|-----------------------------------------------------------------|----------|
| Best-fit values                                                 |          |
| Bottom                                                          | = 0.0    |
| Top                                                             | = 0.5280 |
| LogIC50                                                         | 0.7646   |
| HillSlope                                                       | -6.748   |
| IC50                                                            | 5.816    |
| Span                                                            | = 0.5280 |
| Std. Error                                                      |          |
| LogIC50                                                         | 0.03169  |
| HillSlope                                                       | 2.982    |

**Supplemental Fig. 2. Dose response of *S. cerevisiae* 20S proteasome to TCH-013.** 20S proteasome purified from *S. cerevisiae* (1 nM) was activated in 0.03% SDS, 10 mM Tris-HCl pH 7.5 and 5  $\mu$ M Suc-LLVY-AMC substrate was used to measure the CT-L activity according to materials and methods. The data was fit to a four parameter variable slope to determine the IC<sub>50</sub>.

A

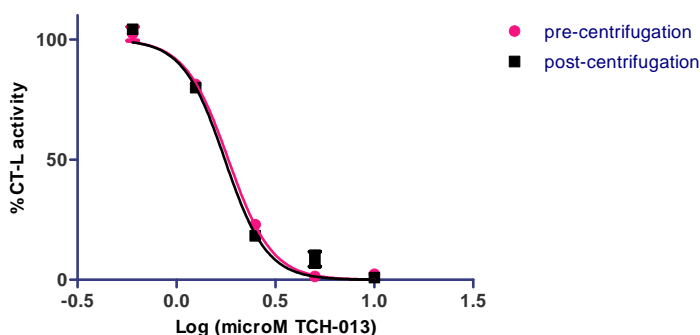

B

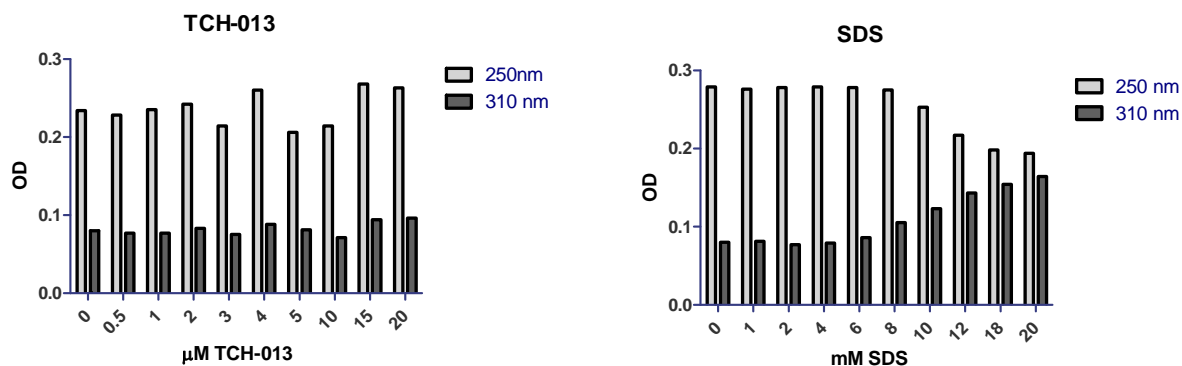

**Supplemental Fig. 3. TCH-013 does not form colloidal aggregates with the 20S proteasome.**

(A) The  $IC_{50}$  of TCH-013 does not change after high speed centrifugation of the reaction. Purified human 20S proteasome (1 nM) was activated with 0.03% SDS, 10 mM Tris-HCl and treated with TCH-013. The CT-L activity of the proteasome was measured as described in materials and methods. The reaction was centrifuged at 15,000 X g at 4°C for thirty minutes and the CT-L activity of the proteasome was measured again. The data was fit to a four parameter variable slope to determine the respective  $IC_{50}$  values. (B) TCH-013 does not reach a critical micellar concentration (CMC) at doses concentrations (tested up to 20 μM). CMC was determined based on the tautomerization of benzoylacetone described in the supplemental methods. Purified human 20S proteasome was activated with 0.3% SDS, 10 mM Tris-HCl, pH 7.5 and treated with either increasing amounts of SDS or TCH-013. While micelle formation of SDS (at about 8 μM) induces a shift of the band centered at  $\lambda_{250}$  to the band centered at  $\lambda_{310}$  due to the keto form of benzoylacetone tautomerizing to the enolic form of benzoylacetone, there appears to be no shift with the addition of TCH-013 up to 20 μM.

|                   | IC50<br>( $\mu$ M) | Concentration<br>tested ( $\mu$ M) | % CT-L Activity  |          |                 |                       |
|-------------------|--------------------|------------------------------------|------------------|----------|-----------------|-----------------------|
|                   |                    |                                    | No<br>competitor | 0.5% BSA | 0.1%<br>Trypsin | 0.04%<br>triton X-100 |
| <b>TCH-013</b>    | 2.5                | 10                                 | 0%               | 0.00%    | 0%              | 58.50%                |
| <b>bortezomib</b> | 0.008              | 0.05                               | 0%               | 0.00%    | 0%              | 3.50%                 |

**Supplemental Table 1. TCH-013 does not inhibit the proteasome through aggregate formation.** The IC<sub>50</sub> of TCH-013 and bortezomib was determined using 1 nM purified human 20S proteasome activated with 0.3%SDS, 10 mM Tris-HCl pH 7.5 with 5  $\mu$ M Suc-LLVY-AMC according to the procedure in materials and methods. The percentage of CT-L activity was determined with the addition of no competitor, 0.5% BSA, 0.1% trypsin or 0.04% triton X-100 before the addition of TCH-013.

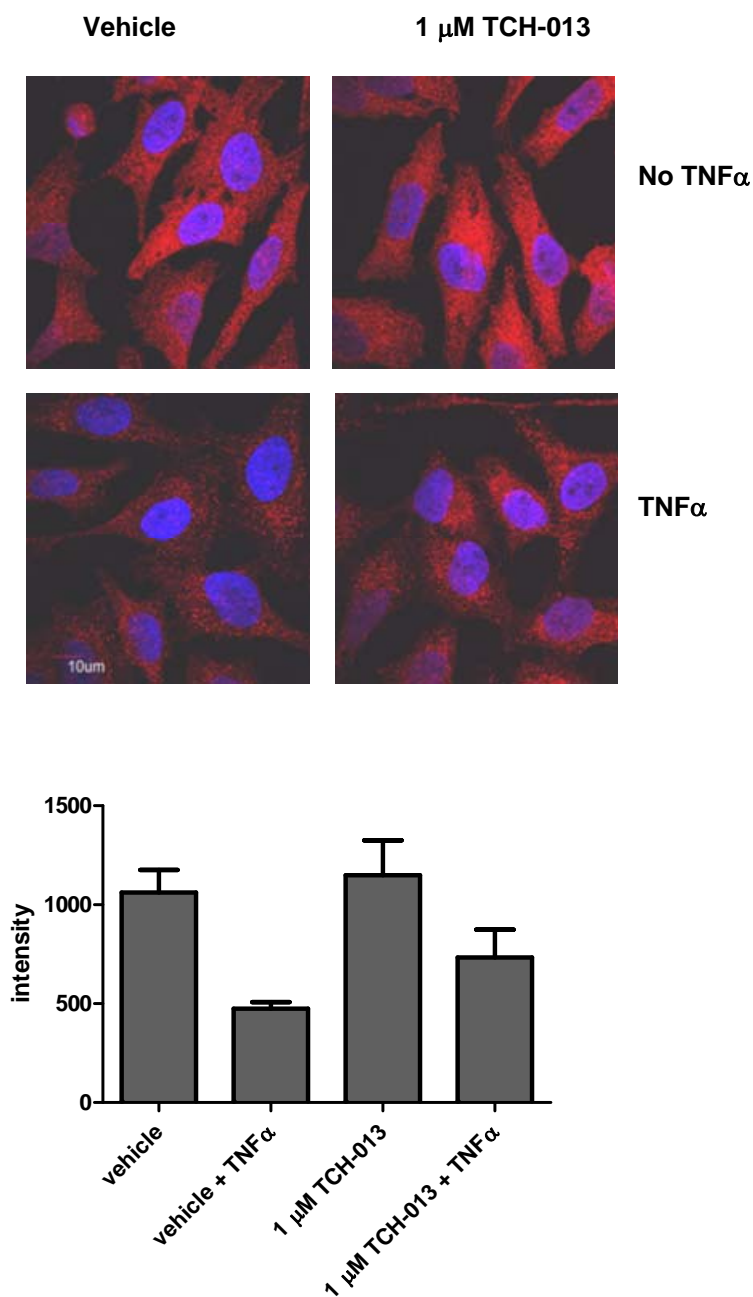

**Supplemental Fig. 4. Confocal Microscopy of I $\kappa$ B $\alpha$  stabilization after TCH-013 treatment using antibody directed toward the N-terminus of I $\kappa$ B $\alpha$ .** ). Representative photos showing fluorescent confocal images of HeLa cells treated with either vehicle or 1  $\mu\text{M}$  TCH-013 and either stimulated with 10 ng/mL  $\text{TNF}\alpha$  or left untreated. The cells were fixed and subsequently stained for the presence of I $\kappa$ B $\alpha$  (red) and counterstained for DNA with DAPI (blue).

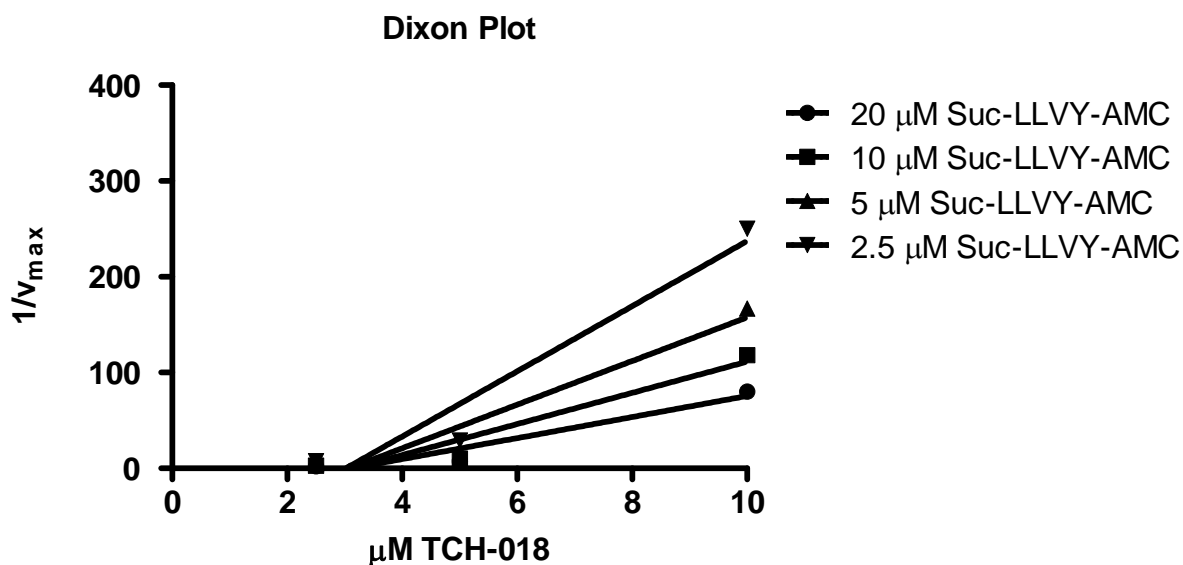

| <u>[I]</u> | <u>V<sub>max</sub></u> | <u>V<sub>max</sub></u><br><u>(app)</u> | <u>K<sub>i</sub></u> |
|------------|------------------------|----------------------------------------|----------------------|
| 0          | 0.991                  | 0.99                                   | --                   |
| 5          | 0.991                  | 0.24                                   | 2.2                  |
| 2.5        | 0.991                  | 0.72                                   | 2.8                  |
| 1.25       | 0.991                  | 0.85                                   | 2.1                  |
|            |                        | <b>mean</b>                            | <b>2.4</b>           |
|            |                        | <b>stdev</b>                           | <b>0.4</b>           |

**Supplemental Fig. 5. Determination of  $K_i$  of TCH-013 using for substrates Suc-LLVY-AMC using Dixon plot.** Human purified 20S particles (1 nM) was activated in 0.03% SDS, 10 mM Tris-HCL pH 7.5 and substrate was added in a range of 0-20  $\mu\text{M}$ . The maximum increase in fluorescence per minute was used to calculate specific activities of each sample and  $K_i$  was calculated based on the data obtained from the Michaelis-Menton derived  $V_{max}$  and apparent  $V_{max}$  using the following equation:  $V_{max_{app}} = V_{max}/(1+[I]/K_i)$ .

A

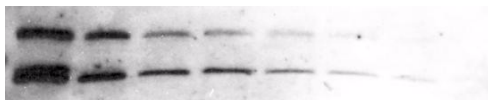

B

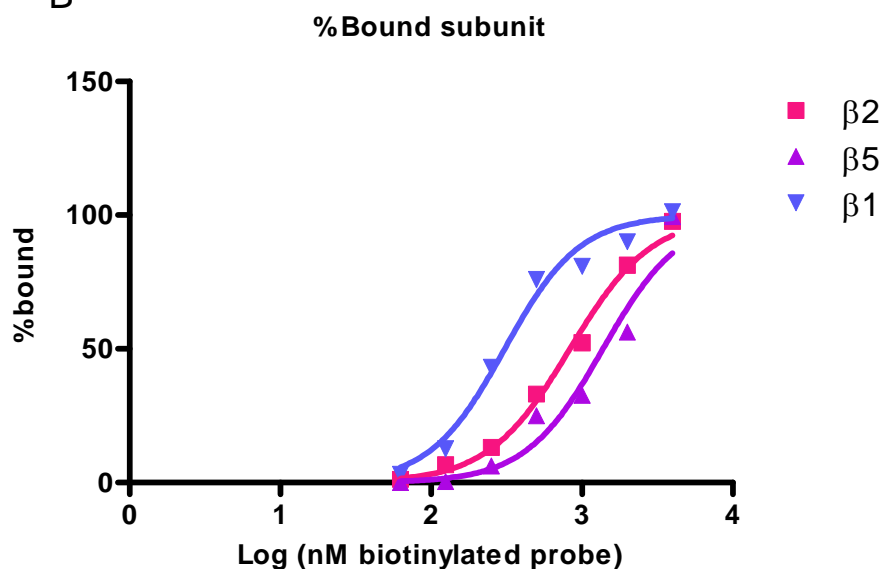

|                                          | T-L     | CT-L    | PGPH    |
|------------------------------------------|---------|---------|---------|
| Sigmoidal dose-response (variable slope) |         |         |         |
| Best-fit values                          |         |         |         |
| Bottom                                   | = 0.0   | = 0.0   | = 0.0   |
| Top                                      | = 100.0 | = 100.0 | = 100.0 |
| LogEC50                                  | 2.921   | 3.139   | 2.488   |
| HillSlope                                | 1.599   | 1.693   | 1.752   |
| EC50                                     | 832.7   | 1378    | 307.6   |
| Std. Error                               |         |         |         |
| LogEC50                                  | 0.02537 | 0.05999 | 0.03939 |
| HillSlope                                | 0.1351  | 0.3706  | 0.2492  |

**Supplemental Fig. 6.** **A.** Western blot of the biotinylated probe Ada-Lys(biotinyl)-(Ahx)<sub>3</sub>-(Leu)<sub>3</sub>-vinyl sulfone at various concentrations. **B.** Determination of half maximal binding of the biotinylated probe Ada-Lys(biotinyl)-(Ahx)<sub>3</sub>-(Leu)<sub>3</sub>-vinyl sulfone.

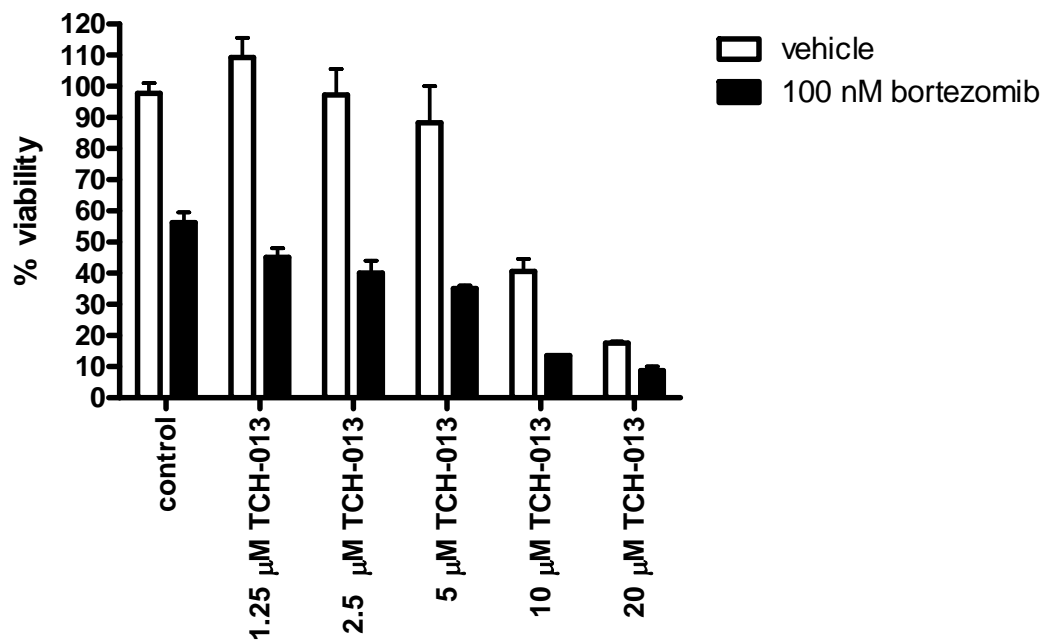

**Supplemental Fig. 7.** L363 Cells treated with TCH-013 or combination of TCH-013/100 nM bortezomib for 15 hours and viability measured by MTS

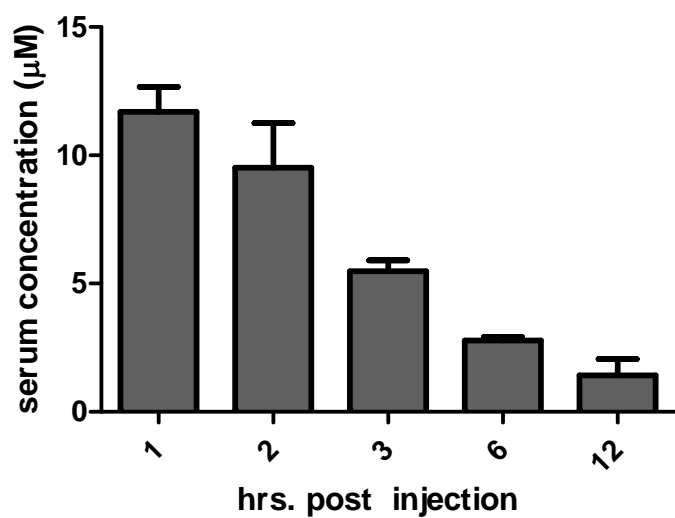

**Supplemental Fig. 8.** Blood serum levels of TCH-013 in BALB/c mice. Blood levels of TCH-013 were measured by LC/MS at 1, 2, 3, 6 and 12 hours post IP injection of 150 mg/kg TCH-013. ( $K_{elim} = 0.203 \pm 0.003$ ,  $T_{1/2} = 3.3 \pm 0.2$  hours)

**A**

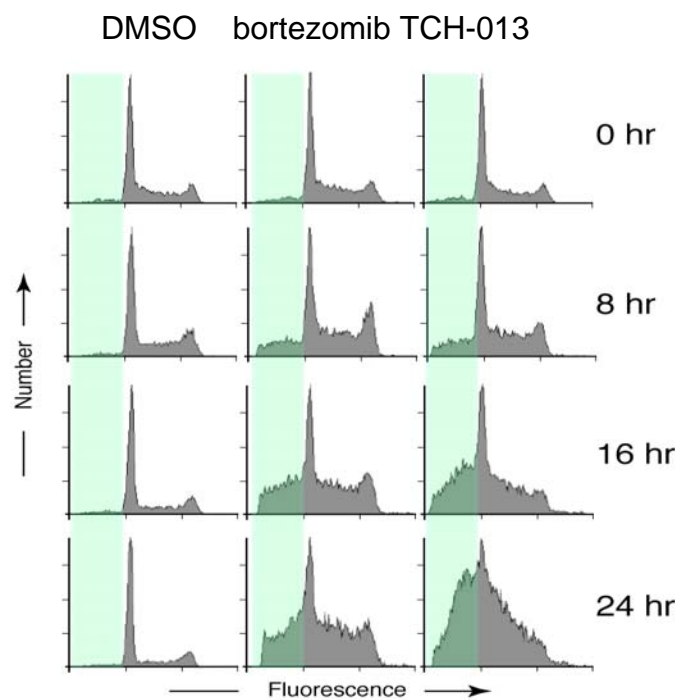

**B**

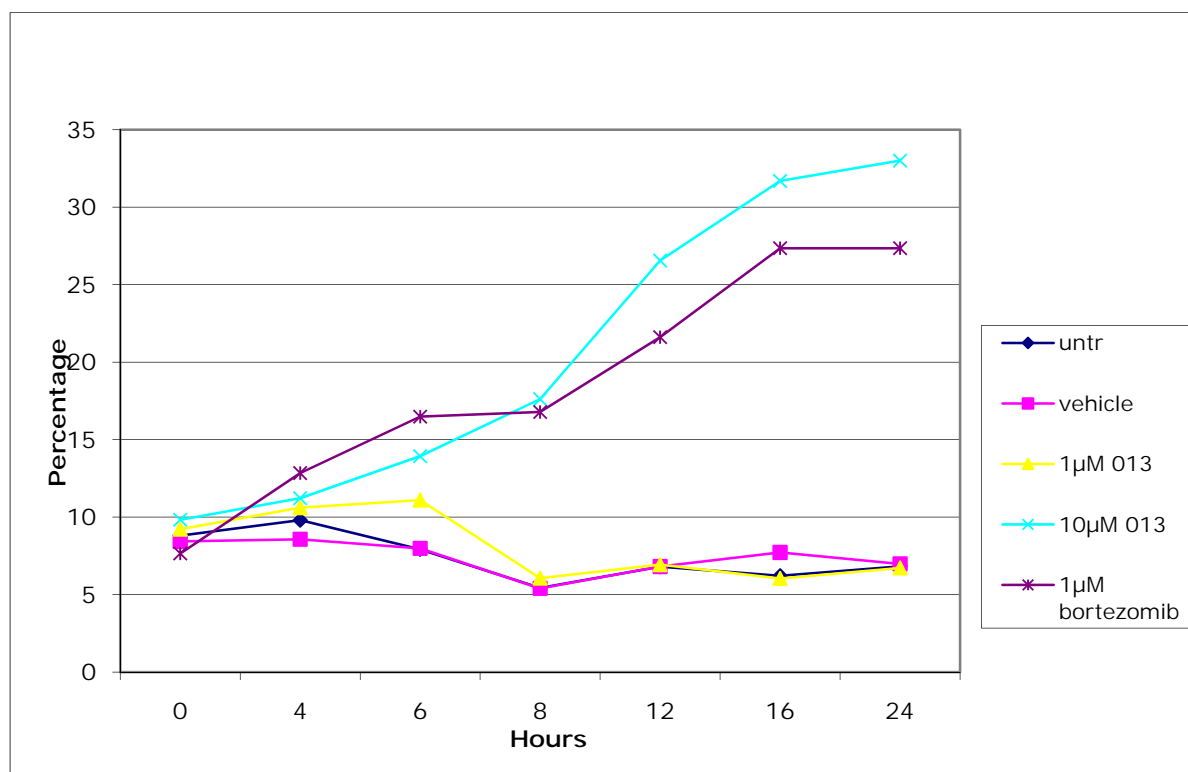

|                                      | <b>0 hr.</b> | <b>4 hr.</b> | <b>6 hr.</b> | <b>8 hr.</b> | <b>12 hr.</b> | <b>16 hr.</b> | <b>24 hr.</b> |
|--------------------------------------|--------------|--------------|--------------|--------------|---------------|---------------|---------------|
| <b>untreated</b>                     | 8.80         | 9.80         | 7.92         | 5.43         | 6.80          | 6.21          | 6.82          |
| <b>vehicle</b>                       | 8.43         | 8.57         | 7.98         | 5.40         | 6.81          | 7.72          | 6.98          |
| <b>1<math>\mu</math>M 013</b>        | 9.22         | 10.61        | 11.10        | 6.06         | 6.93          | 6.04          | 6.72          |
| <b>10<math>\mu</math>M 013</b>       | 9.83         | 11.22        | 13.93        | 17.61        | 26.55         | 31.69         | 33.00         |
| <b>1<math>\mu</math>M bortezomib</b> | 7.65         | 12.84        | 16.48        | 16.78        | 21.61         | 27.35         | 27.35         |

**Supplemental Fig. 9(A)** TCH-013 causes a rapid increase in DNA fragmentation in RPMI-8226 cells, which is indicative of apoptosis. Human MM cell line RPMI-8226 cells were treated with either: vehicle, bortezomib, or TCH-013 for 0, 8, 16 and 24 hours. The cells were stained with propidium iodide and the cells were analyzed by fluorescence activated cell sorting to measure cellular chromosomal DNA content. **(B)** Percentage of RPMI-8226 cells in sub-G1.

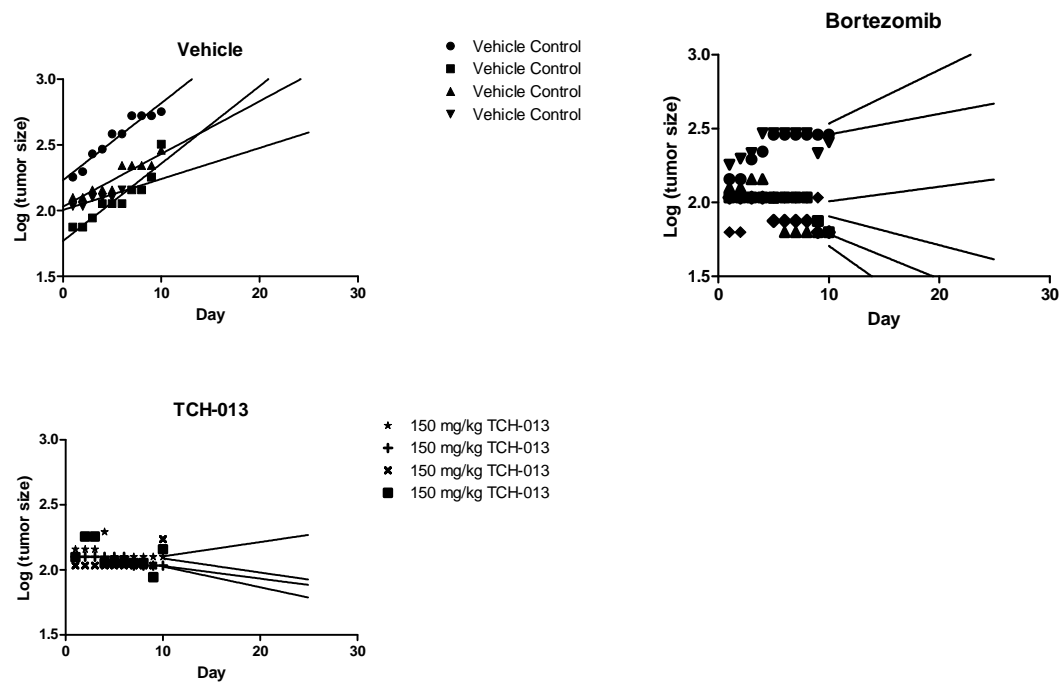

|                   | y-intercept | x-intercept | slope  |
|-------------------|-------------|-------------|--------|
| <b>Vehicle</b>    |             |             |        |
| M1                | 2.231       | -38.100     | 0.058  |
| M2                | 1.769       | -30.000     | 0.058  |
| M3                | 2.031       | -50.700     | 0.040  |
| M4                | 2.005       | -85.000     | 0.023  |
| <b>Bortezomib</b> |             |             |        |
| M1                | 1.909       | -192.200    | 0.009  |
| M2                | 2.171       | -59.700     | 0.036  |
| M3                | 2.101       | 107.800     | -0.019 |
| M4                | 2.237       | 42.160      | -0.053 |
| M5                | 2.320       | -165.700    | 0.014  |
| M6                | 2.090       | 68.800      | -0.030 |
| <b>TCH-013</b>    |             |             |        |
| M1                | 2.197       | 202.100     | -0.010 |
| M2                | 2.127       | 218.400     | -0.009 |
| M3                | 1.993       | -180.800    | 0.011  |
| M4                | 2.185       | 136.900     | -0.015 |

**Supplemental Fig 10.** Log-linear regression analyses of individual mice during the time of treatment.

## References:

1. Dominquez, A.; Fernandez, A.; Gonzalez, N.; Iglesias, E.; Montenegro, L., Determination of critical micelle concentration of some surfactants by three techniques. *J. Chem. Ed.* **1997**, 74, 1227-1231.
2. Lansdell, T. A.; Hewlett, N. M.; Skoumbourdis, A. P.; Fodor, M. D.; Seiple, I. B.; Su, S.; Baran, P. S.; Feldman, K. S.; Tepe, J. J., Palau'amine and Related Oroidin Alkaloids Dibromophakellin and Dibromophakellstatin Inhibit the Human 20S Proteasome. *J. Nat. Prod.* **2012**, 75, (5), 980-5.
